# Supplementary material
Source: publisher figshare collection journal article supplement (https://acs.figshare.com/ndownloader/files/3829201)
Supplement: Supplementary file 1 [file 3829201]

## SUPPORTING INFORMATION

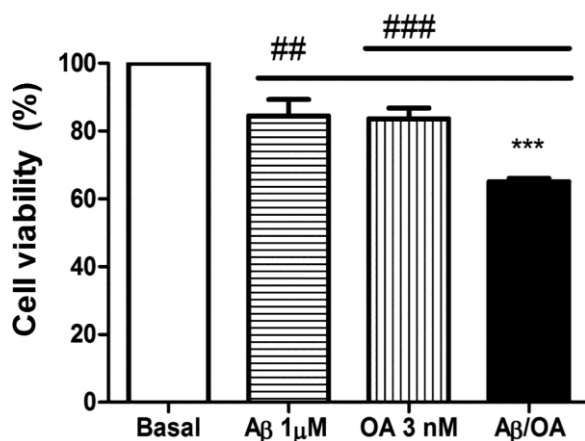

**SI-1- Effect of 1  $\mu$ M A $\beta$ , 3 nM OA or their association on primary neuronal cell culture viability.** Values are expressed as means  $\pm$  SEM of 4 different cultures, \*\*\*P < 0.001 compared to basal; ###P < 0.001, ##P < 0.01, with respect to both toxic stimuli combined.

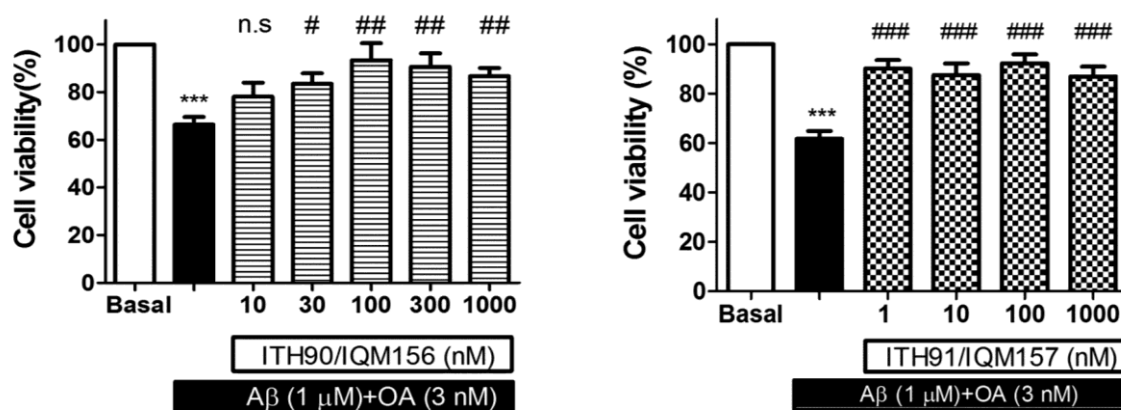

**SI-2- Concentration response curves of compounds ITH90/IQM156 and ITH91/IQM157 on the viability of SH-SY5Y cells exposed to A $\beta$ /OA.** Values are expressed as means  $\pm$  SEM of 4 different cultures, \*\*\*P < 0.001 compared to basal; ###P < 0.001, ##P < 0.01, #P < 0.05 with respect to both toxic stimuli alone. As shown, compound ITH91/IQM157 (compound 4 in the former JMC paper by López-Iglesias et al. 2014) showed a higher potency than compound ITH90/IQM156 (compound 3 in the former JMC paper by López-Iglesias et al. 2014), so we selected compound ITH91/IQM157 instead of ITH90/IQM156.
